# Supplementary material for: Population Dynamics of Aedes aegypti and Aedes albopictus in Two Rural Villages in Southern Mexico: Baseline Data for an Evaluation of the Sterile Insect Technique
Source: MDPI journal article supplement (doi:10.3390/insects12010058), 2021-01-11
Supplement: s1 [file s1]

## SUPPLEMENTAL MATERIAL

**Table S1.** Data of the 4-week periods and dates of the dry and rainy seasons during 3-years of sampling at the Hidalgo and Río Florido villages. The rainy season was taken to have started when precipitation exceeded 100 mm during a 4-week period, and to have ceased when precipitation fell below this level.

| Sampling year | Dry season     |                                       | Rainy season   |                                 |
|---------------|----------------|---------------------------------------|----------------|---------------------------------|
|               | 4-week periods | Date                                  | 4-week periods | Date                            |
| 2016          | 1 - 4          | 3 January to<br>23 April, 2016        | 5 - 12         | 24 April to<br>3 December, 2016 |
| 2016-2017     | 13 - 3         | 4 December, 2016 to<br>25 March, 2017 | 4 - 11         | 26 March to<br>4 November, 2017 |
| 2017-2018     | 12 - 3         | 5 November, 2017 to<br>24 March, 2018 | 4 - 12         | 25 March to<br>1 December, 2018 |

**Table S2.** Mixed model analyses of deviance with type II Wald  $\chi^2$  tests (negative binomial responses)

I: Egg counts from ovitraps inside and outside of houses within villages

| Source                         | $\chi^2$ | d.f. | P                   |
|--------------------------------|----------|------|---------------------|
| Year (2016 – 2018)             | 148.9013 | 2    | <b>&lt; 2.2e-16</b> |
| Season (rainy, dry)            | 69.2567  | 1    | <b>2.2e-16</b>      |
| Village (Hidalgo, Río Florido) | 1.7546   | 1    | 0.185294            |
| Location (indoor, outdoor)     | 7.4052   | 1    | <b>0.006504</b>     |
| Season*location                | 1.0361   | 1    | 0.308739            |
| Season*village                 | 0.5898   | 1    | 0.442505            |
| Season*location*village        | 0.2698   | 1    | 0.603495            |

P values in bold type are significant (P<0.05).

II. Estimated abundance of *Ae. aegypti* and *Ae. albopictus* in samples from within villages

| Source                                                 | $\chi^2$ | d.f. | P                   |
|--------------------------------------------------------|----------|------|---------------------|
| Year (2016 – 2018)                                     | 541.3414 | 2    | <b>&lt; 2.2e-16</b> |
| Season (rainy, dry)                                    | 44.1734  | 1    | <b>3.005e-11</b>    |
| Village (Hidalgo, Río Florido)                         | 0.4235   | 1    | 0.51521             |
| Location (indoor, outdoor)                             | 0.0319   | 1    | 0.85817             |
| Species ( <i>Ae. aegypti</i> , <i>Ae. albopictus</i> ) | 31.6260  | 1    | <b>1.869e-08</b>    |
| Season*location                                        | 0.0134   | 1    | 0.90773             |
| Season*species                                         | 0.0055   | 1    | 0.94082             |
| Location*species                                       | 44.4385  | 1    | <b>2.625e-11</b>    |
| Season*village                                         | 0.2231   | 1    | 0.63671             |
| Location*village                                       | 4.5333   | 1    | <b>0.03324</b>      |
| Species*village                                        | 137.9253 | 1    | <b>&lt; 2.2e-16</b> |
| Season*location*species                                | 2.1050   | 1    | 0.14681             |
| Season*location*village                                | 0.0011   | 1    | 0.97335             |
| Season*species*village                                 | 0.1680   | 1    | 0.68191             |
| Location*species*village                               | 6.4034   | 1    | <b>0.01139</b>      |
| Season*location*species*village                        | 0.0353   | 1    | 0.85105             |

P values in bold type are significant (P<0.05)

III. Egg counts from ovitraps placed along transects at a distance of 0, 50 or 100 m from the edge of each village

| Source                         | $\chi^2$ | d.f. | P                   |
|--------------------------------|----------|------|---------------------|
| Year (2016 – 2018)             | 77.5670  | 2    | <b>&lt; 2.2e-16</b> |
| Season (rainy, dry)            | 185.0430 | 1    | <b>&lt; 2.2e-16</b> |
| Village (Hidalgo, Río Florido) | 6.1401   | 1    | <b>0.0132150</b>    |
| Location (0, 50, 100 m)        | 54.6687  | 2    | <b>1.345e-12</b>    |
| Village*location               | 15.9627  | 2    | <b>0.0003418</b>    |
| Season*village                 | 0.0182   | 1    | 0.8925735           |
| Season*location                | 4.4939   | 2    | 0.1057225           |
| Village*season*location        | 2.8793   | 2    | 0.2370120           |

P values in bold type are significant (P<0.05)

**Table S3.** Average ( $\pm$  SE) air temperature, relative humidity and temperature of water from ovitraps at the moment of sampling. Ovitrap were placed inside or outside houses in the dry and rainy seasons in the villages of Río Florido and Hidalgo during a 3-year study. Rainfall was recorded at a nearby weather station.

| Year and season | Location | Río Florido    |                |                 | Hidalgo        |                |                 | Total Rainfall (mm) |
|-----------------|----------|----------------|----------------|-----------------|----------------|----------------|-----------------|---------------------|
|                 |          | Air Temp (°C)  | RH (%)         | Water Temp (°C) | Air Temp (°C)  | RH (%)         | Water Temp (°C) |                     |
| 2016 Dry        | Indoor   | 34.2 $\pm$ 0.2 | 43.8 $\pm$ 0.6 | 26.9 $\pm$ 0.1  | 31.7 $\pm$ 0.1 | 53.5 $\pm$ 0.7 | 27.5 $\pm$ 0.1  | 9                   |
|                 | Outdoor  | 34.1 $\pm$ 0.1 | 45.1 $\pm$ 0.6 | 27.6 $\pm$ 0.1  | 31.1 $\pm$ 0.1 | 59.9 $\pm$ 0.4 | 26.9 $\pm$ 0.1  |                     |
| 2016 Rainy      | Indoor   | 33.0 $\pm$ 0.1 | 61.0 $\pm$ 0.6 | 28.2 $\pm$ 0.1  | 32.0 $\pm$ 0.1 | 63.8 $\pm$ 0.5 | 27.7 $\pm$ 0.1  | 2,908               |
|                 | Outdoor  | 32.8 $\pm$ 0.1 | 61.5 $\pm$ 0.6 | 28.2 $\pm$ 0.1  | 32.0 $\pm$ 0.1 | 64.0 $\pm$ 0.4 | 27.5 $\pm$ 0.1  |                     |
| 2016-2017 Dry   | Indoor   | 32.4 $\pm$ 0.2 | 55.6 $\pm$ 0.8 | 26.6 $\pm$ 0.1  | 30.9 $\pm$ 0.1 | 59.4 $\pm$ 0.7 | 26.4 $\pm$ 0.1  | 52                  |
|                 | Outdoor  | 32.4 $\pm$ 0.2 | 55.4 $\pm$ 0.8 | 26.7 $\pm$ 0.1  | 30.8 $\pm$ 0.1 | 59.9 $\pm$ 0.6 | 26.1 $\pm$ 0.1  |                     |
| 2017 Rainy      | Indoor   | 32.5 $\pm$ 0.1 | 65.9 $\pm$ 0.6 | 27.9 $\pm$ 0.1  | 29.4 $\pm$ 0.1 | 82.5 $\pm$ 0.5 | 28.2 $\pm$ 0.1  | 2,740               |
|                 | Outdoor  | 32.4 $\pm$ 0.1 | 66.3 $\pm$ 0.6 | 28.0 $\pm$ 0.1  | 29.4 $\pm$ 0.1 | 80.4 $\pm$ 0.4 | 27.7 $\pm$ 0.1  |                     |
| 2017-2018 Dry   | Indoor   | 32.2 $\pm$ 0.2 | 56.1 $\pm$ 0.7 | 27.9 $\pm$ 0.1  | 29.0 $\pm$ 0.1 | 75.3 $\pm$ 0.7 | 27.1 $\pm$ 0.1  | 25                  |
|                 | Outdoor  | 32.2 $\pm$ 0.2 | 56.6 $\pm$ 0.7 | 28.2 $\pm$ 0.1  | 29.0 $\pm$ 0.1 | 74.6 $\pm$ 0.5 | 26.9 $\pm$ 0.1  |                     |
| 2018 Rainy      | Indoor   | 32.0 $\pm$ 0.1 | 68.4 $\pm$ 0.6 | 28.3 $\pm$ 0.1  | 29.1 $\pm$ 0.1 | 88.0 $\pm$ 0.3 | 27.7 $\pm$ 0.1  | 2,837               |
|                 | Outdoor  | 32.1 $\pm$ 0.1 | 68.4 $\pm$ 0.5 | 28.3 $\pm$ 0.1  | 29.2 $\pm$ 0.1 | 86.2 $\pm$ 0.3 | 27.4 $\pm$ 0.1  |                     |

Note: Rainy season was end of March-April to October-November, dry season was November to April

**Table S4.** Means ( $\pm$  EE) of air temperature, relative humidity and water temperature from ovitraps at the moment of sampling. Ovitrap were located at 0, 50 and 100 m points in five transects from the edge of the villages of Río Florido and Hidalgo during the dry and rainy seasons of a 3-year study. The data for the road transect between the villages were taken between 13 December 2017 and 28 November 2018.

| Year and season | Distance from edge of village        | Río Florido    |                |                 | Hidalgo        |                |                 |
|-----------------|--------------------------------------|----------------|----------------|-----------------|----------------|----------------|-----------------|
|                 |                                      | Air Temp (°C)  | RH (%)         | Water Temp (°C) | Air Temp (°C)  | RH (%)         | Water Temp (°C) |
| 2016 Dry        | 0 m                                  | 31.2 $\pm$ 0.2 | 58.1 $\pm$ 0.9 | 24.4 $\pm$ 0.1  | 32.2 $\pm$ 0.3 | 55.3 $\pm$ 1.4 | 25.5 $\pm$ 0.2  |
|                 | 50 m                                 | 30.9 $\pm$ 0.2 | 58.9 $\pm$ 0.9 | 24.7 $\pm$ 0.1  | 32.3 $\pm$ 0.3 | 55.6 $\pm$ 1.5 | 26.0 $\pm$ 0.2  |
|                 | 100 m                                | 31.0 $\pm$ 0.2 | 59.8 $\pm$ 0.9 | 24.8 $\pm$ 0.1  | 32.2 $\pm$ 0.3 | 55.8 $\pm$ 1.6 | 25.9 $\pm$ 0.3  |
| 2016 Rainy      | 0 m                                  | 29.3 $\pm$ 0.1 | 77.6 $\pm$ 0.7 | 26.1 $\pm$ 0.1  | 31.8 $\pm$ 0.2 | 65.5 $\pm$ 0.9 | 26.4 $\pm$ 0.2  |
|                 | 50 m                                 | 29.1 $\pm$ 0.1 | 78.9 $\pm$ 0.6 | 26.1 $\pm$ 0.1  | 31.6 $\pm$ 0.2 | 65.8 $\pm$ 0.9 | 26.4 $\pm$ 0.1  |
|                 | 100 m                                | 29.1 $\pm$ 0.1 | 80.2 $\pm$ 0.6 | 26.1 $\pm$ 0.1  | 31.3 $\pm$ 0.2 | 67.7 $\pm$ 0.9 | 26.5 $\pm$ 0.2  |
| 2016-2017 Dry   | 0 m                                  | 29.1 $\pm$ 0.2 | 70.9 $\pm$ 1.3 | 24.3 $\pm$ 0.1  | 30.8 $\pm$ 0.3 | 62.3 $\pm$ 1.1 | 25.0 $\pm$ 0.2  |
|                 | 50 m                                 | 28.9 $\pm$ 0.2 | 70.8 $\pm$ 1.3 | 24.1 $\pm$ 0.1  | 30.5 $\pm$ 0.3 | 62.9 $\pm$ 1.2 | 24.9 $\pm$ 0.2  |
|                 | 100 m                                | 29.1 $\pm$ 0.2 | 72.2 $\pm$ 1.2 | 24.1 $\pm$ 0.1  | 30.3 $\pm$ 0.3 | 64.3 $\pm$ 1.2 | 25.3 $\pm$ 0.2  |
| 2017 Rainy      | 0 m                                  | 29.1 $\pm$ 0.1 | 78.7 $\pm$ 0.7 | 26.0 $\pm$ 0.1  | 29.5 $\pm$ 0.2 | 81.3 $\pm$ 0.7 | 27.2 $\pm$ 0.1  |
|                 | 50 m                                 | 29.1 $\pm$ 0.1 | 78.9 $\pm$ 0.7 | 25.8 $\pm$ 0.1  | 29.6 $\pm$ 0.2 | 81.3 $\pm$ 0.8 | 27.1 $\pm$ 0.1  |
|                 | 100 m                                | 29.3 $\pm$ 0.2 | 79.1 $\pm$ 0.7 | 26.0 $\pm$ 0.1  | 29.3 $\pm$ 0.2 | 82.7 $\pm$ 0.7 | 27.3 $\pm$ 0.1  |
| 2017-2018 Dry   | 0 m                                  | 28.5 $\pm$ 0.2 | 70.5 $\pm$ 0.8 | 25.3 $\pm$ 0.1  | 29.4 $\pm$ 0.3 | 75.1 $\pm$ 1.0 | 25.8 $\pm$ 0.2  |
|                 | 50 m                                 | 28.4 $\pm$ 0.2 | 71.5 $\pm$ 0.9 | 25.1 $\pm$ 0.1  | 29.1 $\pm$ 0.3 | 76.6 $\pm$ 0.9 | 26.1 $\pm$ 0.2  |
|                 | 100 m                                | 28.5 $\pm$ 0.2 | 72.0 $\pm$ 0.8 | 25.1 $\pm$ 0.1  | 29.1 $\pm$ 0.3 | 77.6 $\pm$ 0.9 | 26.0 $\pm$ 0.2  |
| 2018 Rainy      | 0 m                                  | 29.2 $\pm$ 0.1 | 78.3 $\pm$ 0.6 | 26.4 $\pm$ 0.1  | 29.7 $\pm$ 0.2 | 85.8 $\pm$ 0.6 | 26.9 $\pm$ 0.2  |
|                 | 50 m                                 | 29.0 $\pm$ 0.1 | 79.6 $\pm$ 0.6 | 26.3 $\pm$ 0.1  | 29.6 $\pm$ 0.2 | 86.9 $\pm$ 0.4 | 27.1 $\pm$ 0.2  |
|                 | 100 m                                | 29.0 $\pm$ 0.1 | 80.1 $\pm$ 0.5 | 26.3 $\pm$ 0.1  | 29.3 $\pm$ 0.2 | 88.1 $\pm$ 0.4 | 27.0 $\pm$ 0.1  |
| 2017-2018 Dry   | Transect along road between villages |                |                |                 |                |                |                 |
|                 |                                      | 36.3 $\pm$ 0.2 | 45.1 $\pm$ 1.0 | 30.1 $\pm$ 0.2  |                |                |                 |
| 2018 Rainy      |                                      | 34.8 $\pm$ 0.1 | 62.9 $\pm$ 0.8 | 29.3 $\pm$ 0.1  |                |                |                 |

**Table S5.** Total number of *Aedes* spp. eggs collected in ovitraps in the surrounding transects Río Florido, number of eggs tested in laboratory, and number and prevalence of *Ae. aegypti* and *Ae. albopictus* determined by laboratory rearing of samples between January 2016 to November 2018.

| Year and season of sample | Location (distance along transect) | Total eggs collected in ovitraps | Total eggs tested in laboratory | <i>Ae. aegypti</i>          | <i>Ae. albopictus</i>       |
|---------------------------|------------------------------------|----------------------------------|---------------------------------|-----------------------------|-----------------------------|
|                           |                                    |                                  |                                 | Number of larvae reared (%) | Number of larvae reared (%) |
| 2016 Dry                  | 0 m                                | 1,583                            | 321                             | 10 (7.7)                    | 120 (92.3)                  |
|                           | 50 m                               | 858                              | 355                             | 15 (7.7)                    | 181 (92.3)                  |
|                           | 100 m                              | 386                              | 280                             | 8 (5.6)                     | 135 (94.4)                  |
| 2016 Rainy                | 0 m                                | 7,729                            | 3,155                           | 46 (4.5)                    | 970 (85.5)                  |
|                           | 50 m                               | 4,227                            | 2,333                           | 11 (1.1)                    | 983 (98.9)                  |
|                           | 100 m                              | 3,705                            | 2,092                           | 10 (0.9)                    | 1,059 (99.1)                |
| 2016-2017 Dry             | 0 m                                | 861                              | 449                             | 1 (0.6)                     | 158 (99.4)                  |
|                           | 50 m                               | 747                              | 434                             | 0 (0.0)                     | 181 (100)                   |
|                           | 100 m                              | 769                              | 364                             | 1 (0.6)                     | 157 (99.4)                  |
| 2017 Rainy                | 0 m                                | 9,427                            | 3,925                           | 17 (0.7)                    | 2,468 (99.3)                |
|                           | 50 m                               | 8,457                            | 3,728                           | 6 (0.2)                     | 2,500 (99.8)                |
|                           | 100 m                              | 5,333                            | 2,563                           | 1 (0.1)                     | 1,409 (99.9)                |
| 2017-2018 Dry             | 0 m                                | 3,417                            | 2,202                           | 2 (0.2)                     | 1,153 (99.8)                |
|                           | 50 m                               | 2,852                            | 1,922                           | 0 (0.0)                     | 1,113 (100)                 |
|                           | 100 m                              | 2,235                            | 1,210                           | 0 (0.0)                     | 694 (100)                   |
| 2018 Rainy                | 0 m                                | 10,090                           | 3,517                           | 16 (0.7)                    | 2,224 (99.3)                |
|                           | 50 m                               | 13,411                           | 4,622                           | 41 (1.4)                    | 2,856 (98.6)                |
|                           | 100 m                              | 7,960                            | 3,063                           | 2 (0.1)                     | 1,635 (99.9)                |
| <b>Totals</b>             |                                    | <b>84,047</b>                    | <b>36,535</b>                   | <b>187</b>                  | <b>19,996</b>               |

**Table S6.** Total number of *Aedes* spp. eggs collected in ovitraps in the surrounding transects Hidalgo, number of eggs tested in laboratory, and number and prevalence of *Ae. aegypti* and *Ae. albopictus* determined by laboratory rearing of samples between January 2016 to November 2018.

| Year and season of sample | Location (distance along transect) | Total eggs collected in ovitraps | Total eggs tested in laboratory | <i>Ae. aegypti</i>          | <i>Ae. albopictus</i>       |
|---------------------------|------------------------------------|----------------------------------|---------------------------------|-----------------------------|-----------------------------|
|                           |                                    |                                  |                                 | Number of larvae reared (%) | Number of larvae reared (%) |
| 2016 Dry                  | 0 m                                | 970                              | 473                             | 16 (7.6)                    | 195 (92.4)                  |
|                           | 50 m                               | 458                              | 299                             | 30 (17.4)                   | 142 (82.6)                  |
|                           | 100 m                              | 406                              | 184                             | 15 (17.2)                   | 72 (82.8)                   |
| 2016 Rainy                | 0 m                                | 5,147                            | 1,792                           | 46 (6.9)                    | 625 (93.1)                  |
|                           | 50 m                               | 2,533                            | 1,092                           | 3 (0.6)                     | 480 (99.4)                  |
|                           | 100 m                              | 3,723                            | 1,384                           | 49 (8.4)                    | 535 (91.6)                  |
| 2016-2017 Dry             | 0 m                                | 1,605                            | 887                             | 54 (13.8)                   | 336 (86.2)                  |
|                           | 50 m                               | 778                              | 482                             | 0 (0.0)                     | 254 (100)                   |
|                           | 100 m                              | 885                              | 590                             | 0 (0.0)                     | 367 (100)                   |
| 2017 Rainy                | 0 m                                | 8,357                            | 3,614                           | 228 (10.8)                  | 1,884 (89.2)                |
|                           | 50 m                               | 3,606                            | 1,914                           | 26 (3.3)                    | 765 (96.7)                  |
|                           | 100 m                              | 4,069                            | 2,151                           | 25 (3.3)                    | 724 (96.7)                  |
| 2017-2018 Dry             | 0 m                                | 4,292                            | 1,856                           | 60 (6.0)                    | 946 (94.0)                  |
|                           | 50 m                               | 963                              | 767                             | 0 (0.0)                     | 374 (100)                   |
|                           | 100 m                              | 1,204                            | 833                             | 0 (0.0)                     | 323 (100)                   |
| 2018 Rainy                | 0 m                                | 10,643                           | 4,070                           | 153 (7.2)                   | 1,980 (92.8)                |
|                           | 50 m                               | 8,247                            | 2,518                           | 16 (1.9)                    | 825 (98.1)                  |
|                           | 100 m                              | 9,656                            | 2,443                           | 10 (0.8)                    | 1,199 (99.2)                |
| <b>Totals</b>             |                                    | <b>67,542</b>                    | <b>27,349</b>                   | <b>731</b>                  | <b>12,026</b>               |

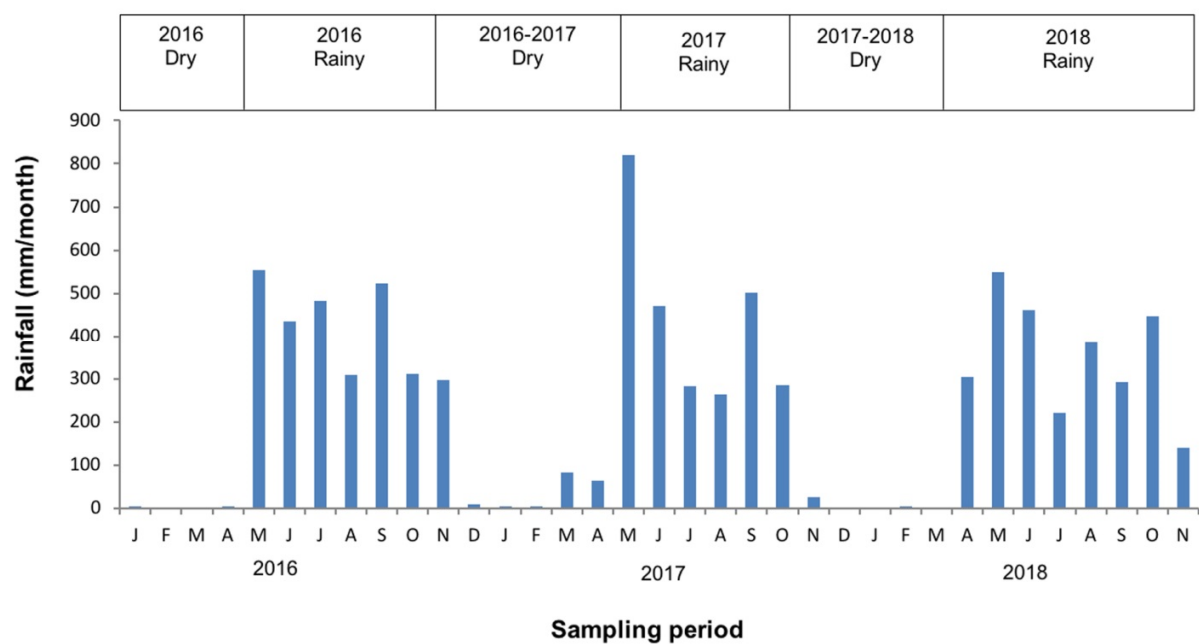

**Figure S1.** Monthly rainfall recorded during three years of sampling at the Hidalgo and Río Florido villages.

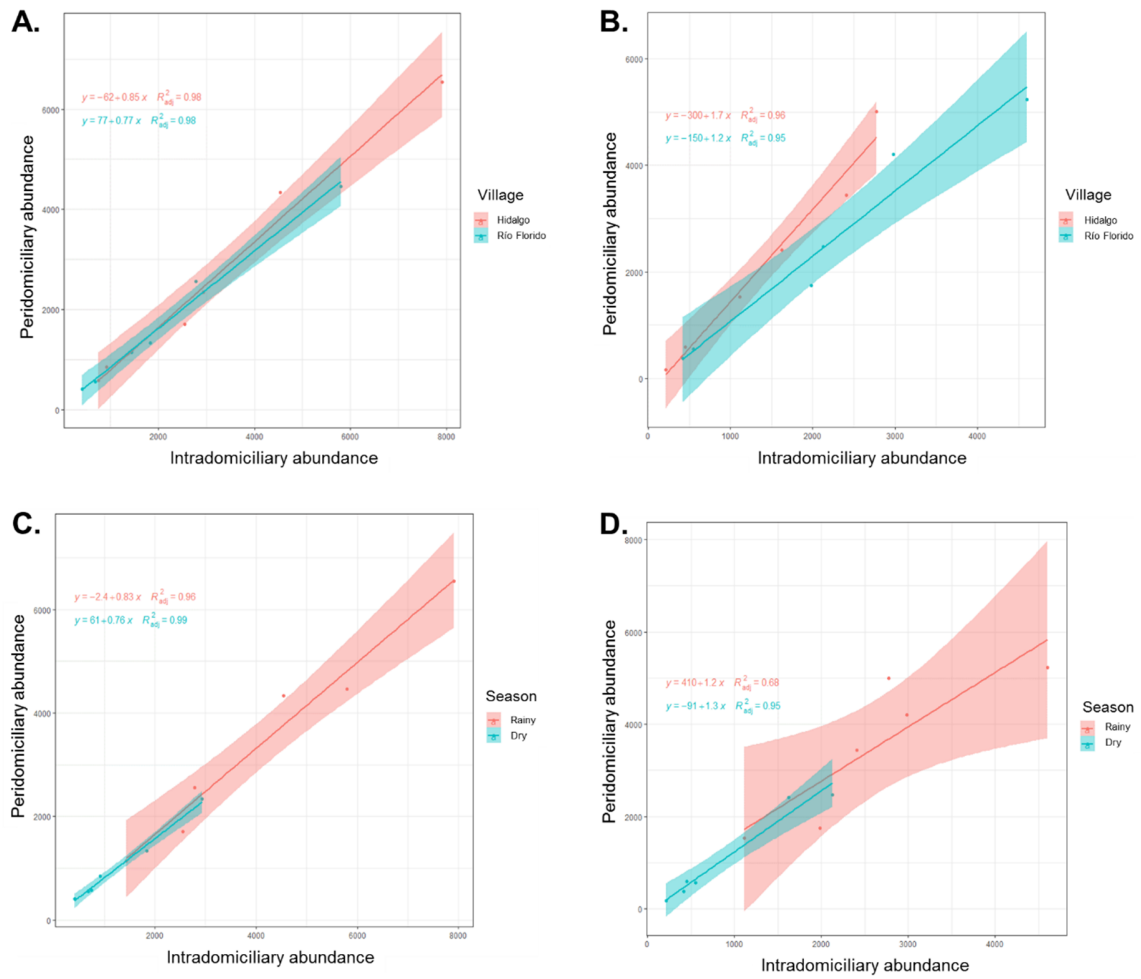

**Figure S2.** Correlations between intradomiciliary and peridomiciliary seasonal estimated abundance of adults of (A) *Ae. aegypti* and (B) *Ae. albopictus* for each village, and (C) *Ae. aegypti* and (D) *Ae. albopictus* for the rainy and dry seasons.
